# Supplementary material
Source: PubMed Central journal article supplement (PMC8970532)
Supplement: NIHMS1721220-supplement-Appendix_A__Tool_.pdf [file NIHMS1721220-supplement-Appendix_A__Tool_.pdf]

| <b>Employee Info</b>                               | <b>Yes</b> | <b>No</b> |
|----------------------------------------------------|------------|-----------|
| Badge present                                      |            |           |
| Employees' last name on badge                      |            |           |
| Cell phone or other device for communicating       |            |           |
| Working alone                                      |            |           |
| Lanyard around neck or other objects around neck   |            |           |
| Check in and out with employer or central location |            |           |
| Visible Weapon: Specify type _____                 |            |           |

|                                      | <b>2-way radio</b> | <b>Cell phone</b> | <b>Other</b> |
|--------------------------------------|--------------------|-------------------|--------------|
| Means of communicating with employer |                    |                   |              |

|                |                                        |                                       |                                  |
|----------------|----------------------------------------|---------------------------------------|----------------------------------|
| Observer _____ | Time In _____                          | Time out _____                        | Subject ID _____                 |
| Patient Type   | <input type="checkbox"/> Adult         | <input type="checkbox"/> Pediatric    | <input type="checkbox"/> Hospice |
| Patient        | <input type="checkbox"/> Height _____  | <input type="checkbox"/> Weight _____ |                                  |
| Dwelling       | <input type="checkbox"/> Single family | <input type="checkbox"/> Multi-family |                                  |
| Neighborhood   | <input type="checkbox"/> Urban         | <input type="checkbox"/> Suburban     | <input type="checkbox"/> Rural   |

Temperature

Outside Home \_\_\_\_\_

Inside Home \_\_\_\_\_

Weather conditions: \_\_\_\_\_

| <b>Exposures for Slips/Trips/Falls</b>                       |                                                 |                                                       |  |
|--------------------------------------------------------------|-------------------------------------------------|-------------------------------------------------------|--|
| <b>Outside of patient home</b>                               |                                                 |                                                       |  |
| <input type="checkbox"/> uneven pavement                     | <input type="checkbox"/> cluttered walkway      | <input type="checkbox"/> precipitation                |  |
| <input type="checkbox"/> animals                             | <input type="checkbox"/> Stairs without railing | <input type="checkbox"/> lighting inadequate          |  |
| <input type="checkbox"/> Slip/Trip/Fall, no decent to ground |                                                 | <input type="checkbox"/> slip/trip/fall to the ground |  |
| <b>Within the home</b>                                       |                                                 |                                                       |  |
| <input type="checkbox"/> uneven walkways                     | <input type="checkbox"/> cluttered walkway      | <input type="checkbox"/> animals                      |  |
| <input type="checkbox"/> stairs without railing              | <input type="checkbox"/> lighting inadequate    | <input type="checkbox"/> narrow walkways              |  |
| <input type="checkbox"/> Electrical cords                    | <input type="checkbox"/> throw rugs             | <input type="checkbox"/> water or grease on floor     |  |
| <input type="checkbox"/> Slip/Trip/Fall, no decent to floor  |                                                 | <input type="checkbox"/> slip/trip/fall to the ground |  |

| <b>Sharps</b> | <b>Number Times</b> |
|---------------|---------------------|
|---------------|---------------------|

| <b>Unsecured Needle encountered</b> | <i>Place hash mark for each time observed.</i> |
|-------------------------------------|------------------------------------------------|
| Non-Safety Needle used              |                                                |
| Safety Needle used                  |                                                |
| Sharps Container Used               |                                                |
| Improvised Sharp Container Used     |                                                |
| Needle left uncapped                |                                                |
| Needles reused                      |                                                |
| Used Needles recapped               |                                                |

| <b>Environmental in Home</b>         |                                     |                                      |
|--------------------------------------|-------------------------------------|--------------------------------------|
| <input type="checkbox"/> Mold/Mildew | <input type="checkbox"/> Roaches    | <input type="checkbox"/> Farm Animal |
| <input type="checkbox"/> Dust        | <input type="checkbox"/> Pesticides | <input type="checkbox"/> Rat/Mice    |
| <input type="checkbox"/> Bed Bugs    | <input type="checkbox"/> Dog        | <input type="checkbox"/> Bird        |
| <input type="checkbox"/> Lice        | <input type="checkbox"/> Cat        | <input type="checkbox"/> Reptile     |

| <b>Tobacco Smoke</b>           | Cigarettes | Cigars | Electronic Cigarettes | Other |
|--------------------------------|------------|--------|-----------------------|-------|
| Smell in Home                  |            |        |                       |       |
| Active Smoking                 |            |        |                       |       |
| Smoking allowed but not active |            |        |                       |       |
| Smoking outside home           |            |        |                       |       |

| <b>Hand Hygiene- <i>place hash mark for each time observed.</i></b> |                                    |                                   |
|---------------------------------------------------------------------|------------------------------------|-----------------------------------|
| <b>Number of Times</b>                                              | <b>Before Contact With Patient</b> | <b>After Contact With Patient</b> |
| Hand sanitizer used                                                 |                                    |                                   |
| Washed hands with soap and water                                    |                                    |                                   |
| Dried hands with reusable towel                                     |                                    |                                   |
| Dried hands with disposable towel                                   |                                    |                                   |



|                                                                      |                 |
|----------------------------------------------------------------------|-----------------|
| <b>Community Surveillance</b>                                        | <b>Observed</b> |
| Known High Crime Rate Area                                           |                 |
| Violent Activity                                                     |                 |
| Nearby Law Enforcement                                               |                 |
| Loitering                                                            |                 |
| Unrestrained Animals                                                 |                 |
| No safe place to park (where parked _____)                           |                 |
| Clear walking Path to Patients Home                                  |                 |
| <b>Patient Factors for Aggression</b>                                | <b>Observed</b> |
| Confusion                                                            |                 |
| Alcohol Intoxication                                                 |                 |
| Drug abuse/ Drug Paraphernalia                                       |                 |
| <b>Verbal Abuse</b>                                                  | <b>Observed</b> |
| Remarks about employee race/ethnicity/gender/age/identity            |                 |
| Yelling or shouting at employee                                      |                 |
| Other verbal abuse                                                   |                 |
| <b>Sexual Abuse</b>                                                  | <b>Observed</b> |
| Sexually explicit comments                                           |                 |
| Sexually teased                                                      |                 |
| Sexual jokes                                                         |                 |
| Sexual gestures (i.e. using parts of the body to suggest sex)        |                 |
| Sexist remarks (i.e. gender-based insults)                           |                 |
| Exposure to sexually explicit materials                              |                 |
| Asking for dates                                                     |                 |
| Asking to be touched in areas of the body that are sexually oriented |                 |
| Groped or fondled                                                    |                 |
| Unnecessarily exposing themselves in front of employee               |                 |
| Offered money for sex                                                |                 |
| Asking intrusive questions about the employees body                  |                 |
| Asking intrusive questions about the employees sex life              |                 |
| <b>Threats of Violence</b>                                           | <b>Observed</b> |
| Verbal threats to harm employee                                      |                 |
| Firearms in the home                                                 |                 |
| Showing behaviors of self-harm                                       |                 |

| Physical Violence                                                                                       | Observed |
|---------------------------------------------------------------------------------------------------------|----------|
| Throwing objects at worker                                                                              |          |
| Intentional spitting or putting other bodily fluid on employee                                          |          |
| Physically restrain employee [STOP and Consider Calling 911]                                            |          |
| Choke employee [STOP and CALL 911]                                                                      |          |
| Physical violence (e.g., hitting, biting, slapping, punching, swinging) [STOP and Consider Calling 911] |          |
| Cat / Dog nip or attack                                                                                 |          |

| Source of Aggression          |                                        |                                    |                                  |
|-------------------------------|----------------------------------------|------------------------------------|----------------------------------|
| <input type="checkbox"/> Pets | <input type="checkbox"/> Family Member | <input type="checkbox"/> Neighbors | <input type="checkbox"/> Patient |

| Injuries            | Observed |
|---------------------|----------|
| Employee Injured    |          |
| Patient Injured     |          |
| Supervisor Notified |          |
| Seek Immediate Care |          |

Describe type of injury and part of body injured:

---



---

| <b>Ergonomics- <i>place hash mark for each time observed.</i></b> | <b>Kneel</b> | <b>Reach</b> | <b>Lift</b> | <b>Bend</b> | <b>Pull/push</b> | <b>Stoop</b> |
|-------------------------------------------------------------------|--------------|--------------|-------------|-------------|------------------|--------------|
| Reposition in Bed                                                 |              |              |             |             |                  |              |
| Transfer from bed to chair                                        |              |              |             |             |                  |              |
| Transfer chair to bed                                             |              |              |             |             |                  |              |
| Transfer bed to wheelchair                                        |              |              |             |             |                  |              |
| Transfer wheel chair to bed                                       |              |              |             |             |                  |              |
| Transfer bed to bathroom                                          |              |              |             |             |                  |              |
| Lift from floor to bed                                            |              |              |             |             |                  |              |
| Transfer to/from toilet                                           |              |              |             |             |                  |              |
| Transfer to/from bathtub/shower                                   |              |              |             |             |                  |              |
| Change bedding                                                    |              |              |             |             |                  |              |
| Change clothes                                                    |              |              |             |             |                  |              |
| Move Furniture                                                    |              |              |             |             |                  |              |
| Move medical equipment                                            |              |              |             |             |                  |              |
| Patient care / assessment                                         |              |              |             |             |                  |              |
| Other                                                             |              |              |             |             |                  |              |

| <b><i>Place hash mark for each time observed.</i></b> | <b>Slide board</b> | <b>Lift</b> | <b>Lift assist device</b> | <b>Air assist device</b> | <b>Shower chair Raised toilet</b> | <b>Other</b> |
|-------------------------------------------------------|--------------------|-------------|---------------------------|--------------------------|-----------------------------------|--------------|
| Reposition in Bed                                     |                    |             |                           |                          |                                   |              |
| Transfer from bed to chair                            |                    |             |                           |                          |                                   |              |
| Transfer chair to bed                                 |                    |             |                           |                          |                                   |              |
| Transfer bed to wheelchair                            |                    |             |                           |                          |                                   |              |
| Transfer wheel chair to bed                           |                    |             |                           |                          |                                   |              |
| Transfer bed to bathroom                              |                    |             |                           |                          |                                   |              |



|       |  |  |  |  |  |  |  |  |
|-------|--|--|--|--|--|--|--|--|
| CPR   |  |  |  |  |  |  |  |  |
| Other |  |  |  |  |  |  |  |  |

Cleaning / Chemical use- *place hash mark for each time observed.*

|                         | Location | Kitchen |        |                  |                   | Bathroom      |       |              |            | Patient Area |       |           |
|-------------------------|----------|---------|--------|------------------|-------------------|---------------|-------|--------------|------------|--------------|-------|-----------|
|                         | Task     | Floor   | Dishes | Clean appliances | Cleaning counters | Clean bathtub | Floor | Clean toilet | Clean sink | Bed          | Floor | Furniture |
| Product name            |          |         |        |                  |                   |               |       |              |            |              |       |           |
| Manufacturing Container |          |         |        |                  |                   |               |       |              |            |              |       |           |
| Improvised Container    |          |         |        |                  |                   |               |       |              |            |              |       |           |
| Premixed                |          |         |        |                  |                   |               |       |              |            |              |       |           |
| Diluted                 |          |         |        |                  |                   |               |       |              |            |              |       |           |
| Spray                   |          |         |        |                  |                   |               |       |              |            |              |       |           |
| Wipe                    |          |         |        |                  |                   |               |       |              |            |              |       |           |
| Pour                    |          |         |        |                  |                   |               |       |              |            |              |       |           |
| Use of PPE              |          |         |        |                  |                   |               |       |              |            |              |       |           |
| Used Gloves             |          |         |        |                  |                   |               |       |              |            |              |       |           |
| Used Gown               |          |         |        |                  |                   |               |       |              |            |              |       |           |
| Used Eyewear            |          |         |        |                  |                   |               |       |              |            |              |       |           |
| Used Mask               |          |         |        |                  |                   |               |       |              |            |              |       |           |
| Used Respirator         |          |         |        |                  |                   |               |       |              |            |              |       |           |
| Ergonomics              |          |         |        |                  |                   |               |       |              |            |              |       |           |
| Reaching                |          |         |        |                  |                   |               |       |              |            |              |       |           |
| Bending                 |          |         |        |                  |                   |               |       |              |            |              |       |           |
| Stooping                |          |         |        |                  |                   |               |       |              |            |              |       |           |
| Kneeling                |          |         |        |                  |                   |               |       |              |            |              |       |           |
| Push/Pull               |          |         |        |                  |                   |               |       |              |            |              |       |           |

Spill/Splash of hazard (body fluid/chemical)
